# Supplementary material for: The Lived Experiences of Postpartum Women in Ghana Regarding Nursing Care During Childbirth and Their Concept of Care-A Phenomenological Study
Source: Research Square preprint supplement (doi:10.21203/rs.3.rs-257786/v1), 2021-03-04
Supplement: Supplementary file 1 [file 98cd0f190a85a0d1359e2c91.docx]

| Participant 2 | codes |
| --- | --- |
| **I-Good morning and congratulations**  P-Good morning  **I-How are you?**  P-I am fine  **I-How old are you?**  P-I am 31 years old  **I-Where are you from?**  P-I am from Tolon  **I-What tribe are you?**  P-I am a Dagomba |  |
| **I-Can you please tell me your experience of childbirth and labor?**  P-1The way labor is, if not God then no one because it started in the night 8:00pm and I was just managing it like that till 3am and when I came this is my third time as for the nurses the way they are taking good care of us God reward them. As for doing well they are doing well because first in history as you are on your way coming they will welcome you, take your bag and take your things out and if anything is not there they will ask your husband to buy it.  2So as for delivery it can be liken to when an individual dying. The reason why I am saying that is you know the delivery are of types. If is a male child the difficulties are more if it starts it has started but if it is a female child it will start and later stop on and off, on and off but as for a male child labor is not like that. The reason is that you know for women when we are going somewhere, we usually go back and forth, in and out of the room saying that u have forgotten so and so. That is how it is with women when we are going for occasions but for men it is not like that when a man is going somewhere and come out he has come out and he will not go back but it is not so with women. So the way delivery is unless you appreciate and give God his praise and Lordship and when it starts at first water will start coming out and you will arrive at the nurses station they will ask you, if it is blood they quickly attend to you because for blood they don’t delay but if it is water you know the way we drinking water they will see it to be normal but you know they take good care of women that is why I have come all the way from Tolon to this place to deliver.  I-What do you mean by labour is like death.  P-I mean the pain, it is so severe that you can only liken it to death. The pain will let you forget of everything in the world, yes to the point that some people usually say they will not give birth again but after delivery they forget of that all because of how painful it is. | 1Good care, good reception  2Delivery liken to dying,  labor pain determined by child’s sex |
| I-How supportive were these nurses?  P-Oh as for support they were very supportive you know my husband lost both parents and on our way the sister met us and took our bag and asked my husband where is your sister and my husband said he has no father or mother and the sister took our things out of the bag and told us the things we needed to buy in addition to what we already have. Because I did not know and bought somethings less than I should buy. 3They ask me to change my dressing and quickly took me inside oh so nice. there is a saying that some friends are more that bloody relations. The way they treated me as If I am their daughter.  4Because the sister who received us made them to surround me and were doing everything to help. After examine me she encourages me to be resilient and said they have to give a drip and they were just caring and asking me is it painful, which part is paining? When you feel like pushing tell us. And that I should not hesitate to tell them anything. That I should not fear them. They were just talking to me and asking me questions does it pain you and I said yes just that I am being courageous and persevering. They were surprised that I was not behaving like the others and they even asked whether my baby was kicking and I said yes I can feel its movement. | 3Satisfaction, good interpersonal relationship, good care,  4Attention,  monitoring,  encouraging,  persuasive,  caring,  concern,  interactive,  friendly atmosphere |
| **I-How were the others behaving that you weren’t and they were surprise.**  P-5Like the way the sister was crying and saying (oh you people should operate me) and just crying and wailing. I was even scared. Not she alone others were also crying and because I was not they finally asked me whether my baby was moving and I said yes, And she even said that ah, it seems my baby is not moving and I said that you know when you find yourself in a situation, if is pain example if you are in a car and accident occurs what will you do you call on God in you mind, pray and ask God to save you so I told you that I was also in pain just that I am being courageuos and persevering because the way this sister was behaving if I was also going to behave that way and another person also come to be like that we will disturb them the nurses and it is as they are helping and that is why we are coming here.  So I told her that as a woman when pain comes your way just give anything to God and bear it. | 5Stoic, |
| **I-How did you manage the pain?**  P-6Anytime the pain comes I hold onto the bed and clinch my teeth together until the pain goes away and then I will call on God in my heart and recite some verses in my heart not loud. Because I was not crying on top of my voice like others the madam was surprise about me. The only time I cried loud to call madam was where I delivered my baby. And when I called out and she came my baby’s heard was showing and she called another lady who was in gloves and she ran to come and receive my baby. They only asked me to push and on the second push the baby was out and she was asking me have you ever delivered and I said yes, this is my third time and each time I came to T.T.H. I always prepare when I am due to deliver and when they ask me where I want to go and deliver I tell them T.T.H. the last time I came to deliver I met a woman who told me she delivered five times and lost all of them at the point of delivery in a different hospital, but this time around she was referred to T.T.H and immediately she arrived the baby started coming out and one of the orderlies took of her cloth and spread it on the floor and this woman delivered on it 7oh as for this hospital the best. And the woman also said she has seen a different between this hospital and others. So I asked her now that you have seen the difference what will you do anytime you are to deliver and she said she will always ask the husband to bring her to T.T.H and that is what he has seen here over where she has been delivering it is not like that. So our house men always asked ah why are you always saying you want to deliver at T.T.H. and I said any woman who goes to deliver at T.T.H and says there is a problems then it is coming from her, not T.T.H because when you come you have life and they also have life they won’t agree to abuse you so like they asked so in T.T.H when you deliver there you do not get pain or what? And I said not that but they are so caring. | 6Clinching of teeth,  prayers,  reciting of Quaran,  7Satisfaction, |
| I-During labor will you prefer to have an amusing story told to you or music played for you or not?  P-8No actually none of that can help relive the pain the reason is the way pain is example when you kick your foot against a stone and some one is talking to you how do you feel? You usually become angry with the one talking to you how much more labor pain and some one trying to tell stories to you. Eventhoug they always try to have your attention during labor by all talking to you using sweet words they should always observe when the pain is present and when it goes away they start to talk again otherwise if you are not patient enough you can become angry with them or stop any procedure that can be delayed always during the pain. But in general the way nurses are if you are going to compare them to anything, in fact when some died in their hand it is God who says it should happened but not due to the nurses or doctors, they are so good.  **I-How did the midwives manage your labor pain?**  P-Hmm, actually when the pain comes, they come and examine you to see the progress of labor. They usually do V.E which is painful.  **I-What do you wish was done differently?**  P-9Frankly speaking their work is good you know when someone is doing his/her work well what you do is pray that God bless them and help them progress in their work. Example what the madam did for me I just looked at her and said within me that may she prosper in her work, and progress. | 8Talking during pain causes anger,  9Praying for staff,  wishing staff well |
| **I-Initial labor pains and the time of delivery which one is more painful?**  Actually, the time of delivery is more painful.  I-Pregnancy and labor which is more difficult?  P-Labor and delivery is our problem, it is more difficult.  I-Do you think the midwives know the work  P-10Oh yes, a lot haven’t you heard what I said the way the midwife handle me? She cleaned me well and my baby. When she did that I looked at her and prayed she did not her but I prayed that God bless her and prosper her.  I-Were you instructed/coached on deep breathing  P-11No, they did not tell me anything about that.  I-What about medication to reduce your pain  P-No they did not give me any medication for pain  I-And did you asked for any medication to help else with labor pain?  P-12No , I did not ask because I know if they have the medication that can reduce the pain they would have given me. I looked at the way she gave me drip and injected medicine into it and I said to myself if she had medicine for pain she would have given me.  I-Would you have preferred the presence of your husband during labor?  P-13No, I wish he is not present, because some men are there when they see a woman struggling to give birth he can’t sleep. Since yesterday because of how I have been suffering he has not been able to sleep. When I move here he follows you see? So I said may be he took a que from how his mother use to suffer childbirth and he was empathizing with me because he himself have never given birth.  I-Some women say they get angry with their husband when in labor what about you?  P-No for me it is not like that. I will only be angry if he does not show concern when I am in pain that is if I am suffering and he is lying down sleeping. But in my case he showed concerned and brought me with a motor bike.  I-You sat on a motor bike?  P-Yes, even my second delivery I walked from our area to the hospital because it is all part of exercise. When you come to deliver they usually ask you to walk around. | 10Good care, attention,  11No education on pain reliefs.  12Assumed there is no remedy for pain  13Pity for husband,  wish husband not around |
| **I-In all that you have gone through what makes you happy?**  P-14Truly what excites me is seeing that I have delivered a healthy baby and nothing is wrong with me too.  I thank God some came and delivered but lost their children but I have my baby and on top of that I am healthy strong and moving about. Some after delivery are not well. May God serve all women and let all women experience love in their marriage. Experiencing love in marriage can even make you deliver without any problem.  **I-Were you given enough information about labor during antenatal attendants?**  P-Yes, they have some days purposely for that. And they use that day to educate us. They even told us that some of us our husband will ask us not to follow the instructions that they are given us and that we should not listen to our husbands. They are also doing well there.  **I-Did you feel safe and secure in the hands of the midwife?**  P-15Yes, truly I feel because the way the madam (midwife) treated my husband and myself on arrival made me feel that I was in safe hands. It made me feel that some friends are more than relatives.  **I-Why do you say that?**  P-16Because we hadn’t even arrived and the madam quickly met us and took our bag from us and opened it and looked for the necessary things I needed for the delivery and explained things to us. So this action made us happy. And immediately she heard I delivered she came inside and congratulated me.  **I-You said in severe pain you were crying onto God and praying that he helps you, do you wish at that time. You have your spiritual leader also praying for you?**  P-17Yes, actually I would have wished so because it would have helped me. Immediately I delivered my husband called one imam just by our house and gave the phone to me and he was reciting Quaranic verses and finally said that whoever is in the labor ward with me may God cause that person to deliver safely. And we responded Amen. | 14Joy of delivering a healthy baby  15Good reception, good interpersonal relationship  16Friendly atmosphere,  love,  good care,  good communication,  rapport,  17Seeking divine help |
| **I-What was the reason for which your husband made him to recite these things for you?**  P-18My husband told him since last night I could not sleep and this dawn he brought me to the hospital. And the Imam said in situation like that your wisdom and knowledge can not save you unless God and so that is why he prayed for us. You know some of the nurses are also Muslims and they pray for us.  **I-So did the recitation and prayer having any effect on you?**  P-19Yes, truly you know it is God he also called upon and I believe the prayers helped us.  **I-Were you in anyway abused by anyone?**  P-20No they pampered us and took good care of us as they should. Can’t you see they cleaned me and my baby and helped put on my baby’s dress when she saw I was struggling and laid her well for me and said I should be turning her from time to time. As for here when you come and you are not treated well it is your fault. when you come and you give them their respect they will take care of you as if you are from the same mother.  I-Thank you very much for your time and patience. I would get back to you latter if the need be.  P.O.K thank you. | 18Seeking Devine intervention  19Belief in God  20Pampered us,  good care, |
|  |  |
